# Supplementary material for: A Formative Study of the Implementation of Whole Genome Sequencing in Northern Ireland
Source: MDPI journal article supplement (doi:10.3390/genes13071104), 2022-06-21
Supplement: s1 [file s1]

**Table S1:** Participant survey demographics summary

| <b>Participant demographic</b>                                      | <b>Count</b> | <b>Percentage (%)</b> |
|---------------------------------------------------------------------|--------------|-----------------------|
| <i>Participant sex</i>                                              |              |                       |
| - Male                                                              | 6            | 18.8                  |
| - Female                                                            | 25           | 78.1                  |
| - Unknown                                                           | 1            | 3.1                   |
| <i>Survey completed by parent / carer</i>                           | 18           | 56.3                  |
| <i>Age bracket of person unable to complete the form themselves</i> |              |                       |
| - 0 – 17                                                            | 13           | 72.2                  |
| - 18+                                                               | 5            | 27.8                  |
| <i>Age bracket of participant</i>                                   |              |                       |
| - 18-34                                                             | 11           | 34.4                  |
| - 35-44                                                             | 5            | 15.6                  |
| - 45-54                                                             | 7            | 21.9                  |
| - 55+                                                               | 8            | 25.0                  |
| - Skipped question                                                  | 1            | 3.1                   |
| <i>Ethnicity</i>                                                    |              |                       |
| - British                                                           | 8            | 25.0                  |
| - Northern Irish                                                    | 18           | 56.3                  |
| - Other                                                             | 5            | 15.6                  |
| - Skipped question                                                  | 1            | 3.1                   |
| <i>Medical specialism(s) attended</i>                               |              |                       |
| - Cardiology                                                        | 4            | 13.8                  |
| - Dermatology                                                       | 5            | 17.2                  |
| - Ear, nose and throat                                              | 5            | 17.2                  |
| - Gastroenterology                                                  | 5            | 17.2                  |
| - Genetics                                                          | 18           | 62.1                  |
| - General practitioner                                              | 22           | 75.9                  |
| - Haematology                                                       | 1            | 3.4                   |
| - Immunology                                                        | 3            | 10.3                  |
| - Nephrology/Urology                                                | 4            | 13.8                  |
| - Neurology                                                         | 14           | 48.3                  |
| - Oncology                                                          | 2            | 6.9                   |
| - Ophthalmology                                                     | 4            | 13.8                  |
| - Paediatrics                                                       | 11           | 37.9                  |
| - Psychiatry                                                        | 4            | 13.8                  |
| - Respiratory                                                       | 5            | 17.2                  |
| - Rheumatology                                                      | 1            | 3.4                   |
| - Other                                                             | 7            | 24.1                  |

**Table S2:** Themes and associated codes from semi-structured interviews of healthcare professionals

| Theme                                                                                                      | Associated codes                                                                                                                                                                                                                                                                                                                                                                                                                                                                                                               |
|------------------------------------------------------------------------------------------------------------|--------------------------------------------------------------------------------------------------------------------------------------------------------------------------------------------------------------------------------------------------------------------------------------------------------------------------------------------------------------------------------------------------------------------------------------------------------------------------------------------------------------------------------|
| Healthcare professionals had a largely positive experience of the 100KGP                                   | <ul style="list-style-type: none"> <li>- Felt the project ran smoothly / enjoyed participation</li> <li>- Discussed the significant benefits for the patients <i>e.g.</i> ending the diagnostic odyssey / modifying care plans</li> <li>- Reported that they felt the participants also had a good experience of the 100KGP</li> <li>- Emphasised willingness to participate in future similar projects</li> <li>- The multi-disciplinary approach was useful</li> <li>- Felt that WGS was the future of healthcare</li> </ul> |
| Facilitating WGS was a significant workload burden                                                         | <ul style="list-style-type: none"> <li>- Time-consuming</li> <li>- Involved extra hours</li> <li>- Difficult to manage on top of regular workload</li> <li>- Capacity was limited</li> </ul>                                                                                                                                                                                                                                                                                                                                   |
| Interviewees found that participants expressed some concerns about additional findings and time to results | <ul style="list-style-type: none"> <li>- Concerns about additional findings</li> <li>- Concerns about time to results / management of expectations</li> <li>- Generally good understanding</li> <li>- Consent process could be streamlined / excess paperwork</li> </ul>                                                                                                                                                                                                                                                       |
| There is a need for additional training                                                                    | <ul style="list-style-type: none"> <li>- Assumptions were made about genetics understanding beyond specialists</li> <li>- Complicated field to understand</li> <li>- Mainstreaming beyond genetics is needed</li> <li>- Needs to be more straight-forward</li> <li>- Training for non-specialists needed</li> <li>- Concerns patients attending non-specialists may be at a disadvantage</li> <li>- Flow chart of next steps may be useful</li> </ul>                                                                          |

**Table S3:** Themes and associated codes from discussion workshop

| Themes                                                                                | Codes                                                                                                                                                                                                                                                                                                                                                                                                                                                                                                                     |
|---------------------------------------------------------------------------------------|---------------------------------------------------------------------------------------------------------------------------------------------------------------------------------------------------------------------------------------------------------------------------------------------------------------------------------------------------------------------------------------------------------------------------------------------------------------------------------------------------------------------------|
| Theme 1: Resource constraints hinder collaborative rare disease research              | <ul style="list-style-type: none"> <li>• Lack of collaboration</li> <li>• Lack of funding</li> <li>• Lack of political will to provide resources</li> <li>• Lack of incentive for clinical research</li> <li>• Cross border relationships in research enable better utilisation of limited resources on whole island</li> <li>• Incentives needed to encourage research, both as a career and within clinical environments</li> </ul>                                                                                     |
| Theme 2: Collaborative rare disease research is hindered by ineffective communication | <ul style="list-style-type: none"> <li>• Lack of progress</li> <li>• Lack of collaboration</li> <li>• Lack of follow up and dissemination of results</li> <li>• Multidisciplinary approach is needed</li> <li>• Importance of communicating with patients effectively</li> <li>• Need to establish better communication procedures to maintain contact between patients and healthcare professionals</li> <li>• Wider support services need to be available to aid patients/families in processing a diagnosis</li> </ul> |

|                                                                                                     |                                                                                                                                                                                                                                                                                                                                                                                                                                                                                                                                                                                                                                                                                                                                           |
|-----------------------------------------------------------------------------------------------------|-------------------------------------------------------------------------------------------------------------------------------------------------------------------------------------------------------------------------------------------------------------------------------------------------------------------------------------------------------------------------------------------------------------------------------------------------------------------------------------------------------------------------------------------------------------------------------------------------------------------------------------------------------------------------------------------------------------------------------------------|
| <p>Theme 3: Rare disease awareness, support and information services are insufficient.</p>          | <ul style="list-style-type: none"> <li>• Lack of community rare disease awareness / outreach</li> <li>• Need for more communication and engagement on social media</li> <li>• More comprehensive support services need to be available to aid patients/families in processing a diagnosis</li> <li>• Need for more awareness in educational settings</li> <li>• Need for rare disease events as social, educational, and networking opportunities for patients, families, HCP's, and researchers</li> <li>• Need to explore multiple avenues of dissemination of research opportunities and communication.</li> <li>• Lack of true accessibility in facilities deemed accessible</li> <li>• Need for more awareness among HCPs</li> </ul> |
| <p>Theme 4: Current administrative systems are barriers to collaborative rare disease research.</p> | <ul style="list-style-type: none"> <li>• Ethical procedures require streamlining to facilitate research</li> <li>• Hospital ethics procedures are particularly slow compared to institutions</li> <li>• Northern Ireland is slower compared to other parts of the UK</li> </ul>                                                                                                                                                                                                                                                                                                                                                                                                                                                           |
| <p>Theme 5: Interprofessional collaboration was regarded as beneficial for rare diseases.</p>       | <ul style="list-style-type: none"> <li>• Benefits of the multi-disciplinary approach discussed</li> <li>• Need for cross-border collaboration</li> <li>• International collaboration helpful for conditions where only a small number of people in one location are affected</li> </ul>                                                                                                                                                                                                                                                                                                                                                                                                                                                   |
